# Supplementary material for: A Multiprotein Complex Anchors Adhesive Holdfast at the Outer Membrane of Caulobacter crescentus
Source: PubMed Central journal article supplement (PMC6707917; doi:10.1128/jb.00112-19), 2019-08-22
Supplement: JB.00112-19-s0004.pdf [file JB.00112-19-s0004.pdf]

1 **Supplementary Material for Sulkowski *et al***

2 A multi-protein complex anchors adhesive holdfast at the outer membrane of *Caulobacter*  
3 *crescentus*.

4

5 **Authors**

6 Nina I. Sulkowski,<sup>a,b,\*</sup> Gail G. Hardy,<sup>c,\*,#</sup> Yves V. Brun,<sup>c,d</sup> Tanmay A.M. Bharat<sup>a,b,#</sup>

7

8 **Affiliations**

9 <sup>a</sup> Sir William Dunn School of Pathology, University of Oxford, Oxford OX1 3RE, UK

10 <sup>b</sup> Central Oxford Structural and Molecular Imaging Centre, Oxford OX1 3RE, UK

11 <sup>c</sup> Department of Biology, Indiana University, Bloomington, Indiana 47405, USA.

12 <sup>d</sup> Département de microbiologie, infectiologie et immunologie, Université de Montréal, C.P.

13 6128, succ. Centre-ville, Montréal (Québec) H3C 3J7, Canada

14

15

16 **Running Title**

17 *Caulobacter crescentus* outer membrane holdfast anchor

18

19 **Correspondence**

20 # Address correspondence to Gail Hardy, [gahardy@indiana.edu](mailto:gahardy@indiana.edu) or

21 Tanmay A.M. Bharat, [tanmay.bharat@path.ox.ac.uk](mailto:tanmay.bharat@path.ox.ac.uk)

22

23 \* N.I.S. and G.G.H. contributed equally to this work.

24

25 SUPPLEMENTARY FIGURES

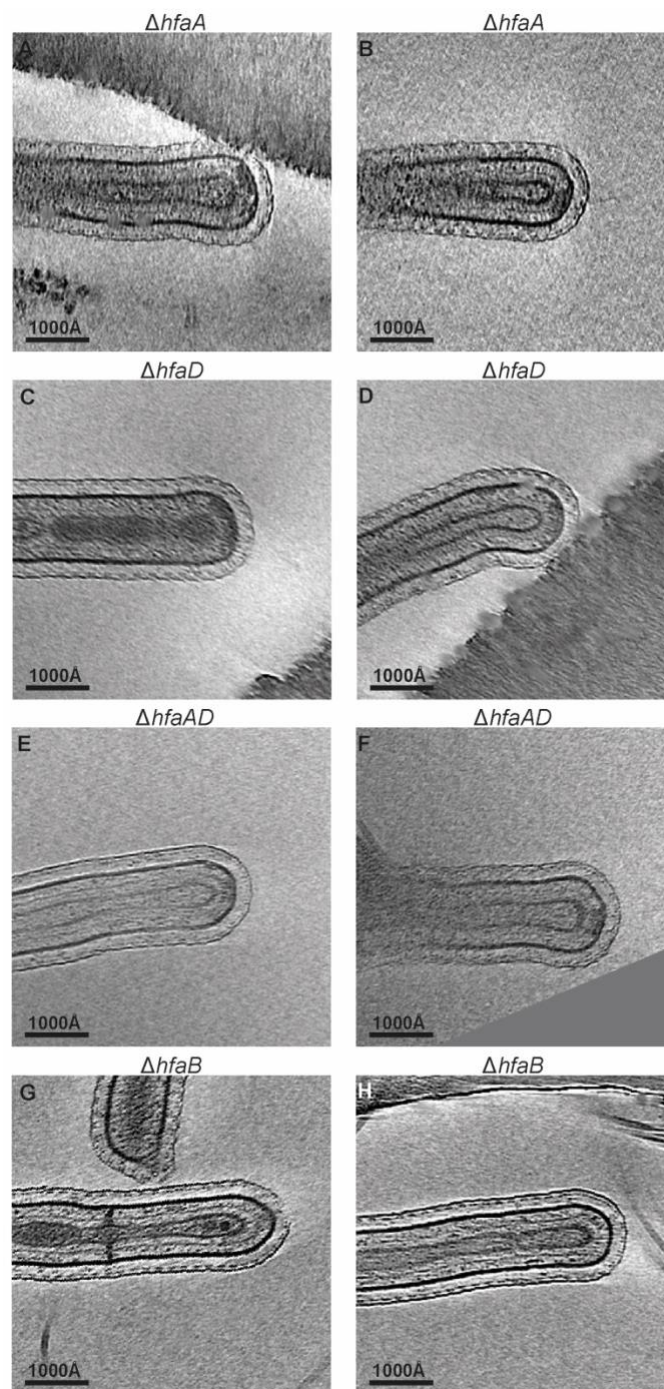

26

27

28

29 **Figure S1. Cryo-ET gallery of *C. crescentus* stalk tips.**

30 Collection of holdfast anchor mutants imaged in this study. (A-B)  $\Delta hfaA$  (C-D)  $\Delta hfaD$  (E-F)

31  $\Delta hfaAD$  (G-H)  $\Delta hfaB$ .

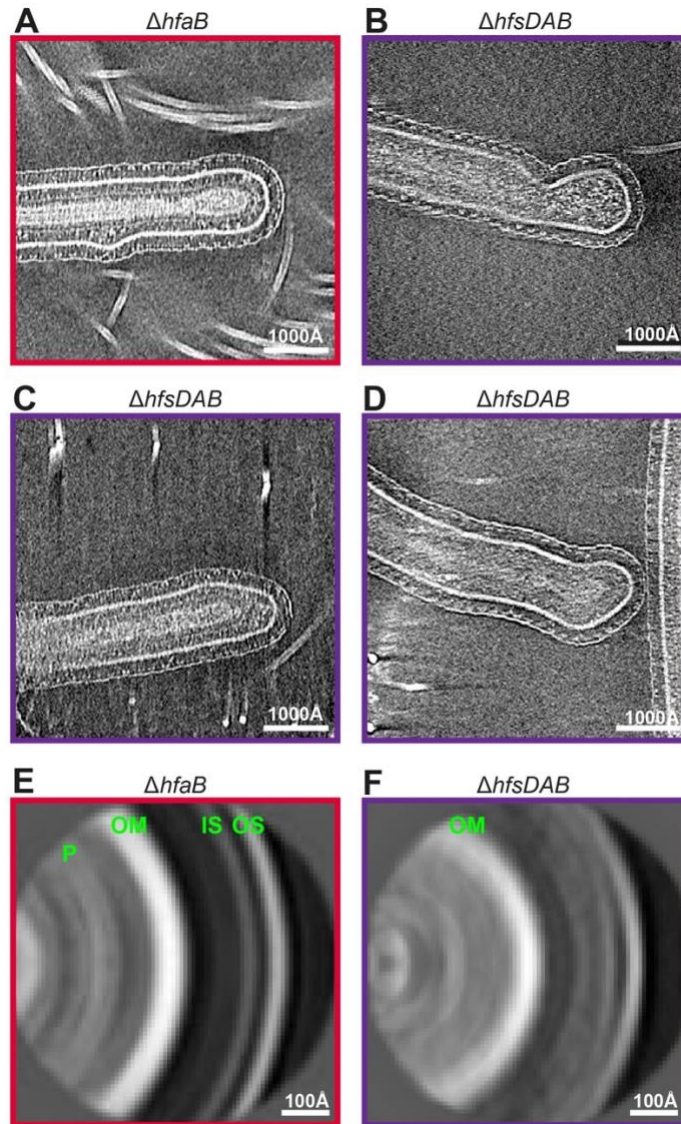

32

33 **Figure S2. Sub-tomogram averaging of the holdfast secretion complex mutant**

34 **( $\Delta hfsDAB$ ).** (A)  $\Delta hfaB$  strain displays uniform curvature along the stalk tip. Panels A is same

35 as Figure 4A, shown here for comparison with B-D panels. (B-D)  $\Delta hfsDAB$  mutant displays

36 aberrations in stalk morphology, with visible narrowing at various regions near the tip. (E) Sub-

37 tomogram averaging analysis of  $\Delta hfaB$  stalk tips. Panel E is same as in Figure 4C. The density

38 layers corresponding to the outer S-layer (OS), inner S-layer (IS), outer membrane (OM) and

39 the peptidoglycan (P) have been marked. (F) Sub-tomogram averaging analysis of  $\Delta hfsDAB$

40 stalks reveals increased OM curvature in the final average.

41

## 42 SUPPLEMENTARY TABLES

43 TABLE S1. Bacterial strains and plasmids used in this study.

| Strain or plasmid               | Description or construction                                                                                                                                                           | Source or reference       |
|---------------------------------|---------------------------------------------------------------------------------------------------------------------------------------------------------------------------------------|---------------------------|
| <b>Strains</b>                  |                                                                                                                                                                                       |                           |
| <i>E. coli</i>                  |                                                                                                                                                                                       |                           |
| S17-1                           | <i>E. coli</i> 294::RP4-2(Tc::Mu)(KM::Tn7)                                                                                                                                            | (1)                       |
| Alpha-select <sup>TM</sup>      | <i>deoR endA1 recA1 relA1 gyrA96 hsdR17</i> ( $\tau_k^-$ $m_k^+$ ) <i>supE44 thi-1</i> $\Delta$ ( <i>lacZYA-argFV169</i> ) $\Phi$ 80 $\delta$ <i>lacZ</i> $\Delta$ M15 F <sup>-</sup> | Bioline                   |
| <i>C. crescentus</i>            |                                                                                                                                                                                       |                           |
| CB15                            | Wild-type                                                                                                                                                                             | (2)                       |
| YB1109                          | CB15 NY111d1 is a clone that has the Abs phenotype (stalk abscission Abs2)                                                                                                            | (3)                       |
| YB2811                          | CB15 Abs2 <i>pstS</i> ::miniTn5                                                                                                                                                       | (4)                       |
| YB767                           | CB15N <i>pstS</i> ::miniTn5                                                                                                                                                           | (5)                       |
| YB7793                          | CB15 Abs2 <i>pstS</i> ::miniTn5, $\Delta$ <i>hfsG</i>                                                                                                                                 | This study                |
| YB7795                          | CB15 Abs2 <i>pstS</i> ::miniTn5, $\Delta$ <i>hfsDAB</i>                                                                                                                               | This study                |
| YB7797                          | CB15 Abs2 <i>pstS</i> ::miniTn5, $\Delta$ <i>hfaB</i>                                                                                                                                 | This study                |
| YB8679                          | CB15 Abs2 <i>pstS</i> ::miniTn5, $\Delta$ <i>hfaA</i>                                                                                                                                 | This study                |
| YB8680                          | CB15 Abs2 <i>pstS</i> ::miniTn5, $\Delta$ <i>hfaD</i>                                                                                                                                 | This study                |
| YB8681                          | CB15 Abs2 <i>pstS</i> ::miniTn5, $\Delta$ <i>hfaA</i> , $\Delta$ <i>hfaD</i>                                                                                                          | This study                |
| <b>Plasmids</b>                 |                                                                                                                                                                                       |                           |
| pNPTS138/9                      | pLitmus 39 derivative; with <i>nptI</i> , <i>sacB</i> and RK2 <i>oriT</i> sequences, and deleted <i>bla</i> gene; Km <sup>R</sup>                                                     | M.R.K. Alley, unpublished |
| pNPTS138 $\Delta$ <i>hfaA</i>   | pNPTS138 parent vector containing 500 bp fragments upstream and downstream of <i>hfaA</i>                                                                                             | (6)                       |
| pNPTS138 $\Delta$ <i>hfaB</i>   | pNPTS138 parent vector containing 500 bp fragments upstream and downstream of <i>hfaB</i>                                                                                             | (6)                       |
| pNPTS138 $\Delta$ <i>hfaD</i>   | pNPTS138 parent vector containing 500 bp fragments upstream and downstream of <i>hfaD</i>                                                                                             | (6)                       |
| pNPTS138 $\Delta$ <i>hfsDAB</i> | pNPTS138 parent vector containing 500 bp fragments downstream of <i>hfsD</i> and downstream of <i>hfsB</i>                                                                            | (6)                       |
| pNPTS138 $\Delta$ <i>hfsG</i>   | pNPTS138 parent vector containing 500 bp fragments upstream and downstream of <i>hfsG</i>                                                                                             | (7)                       |

44

45 Table S1. Bacterial strains and plasmids used in this study.

46 Description of bacterial strains and plasmids used in this study is provided in this table.

47

48

49 **TABLE S2. Oligonucleotides used in this study**

| <b>Oligo Name</b> | <b>Sequence (5' - 3')</b>      | <b>Application</b>              |
|-------------------|--------------------------------|---------------------------------|
| FhfaupA           | GCGATCACGAAGCTTACGAGGTAG       | <i>hfaA</i> in-frame deletion   |
| RmhfadownA        | GGCGTCAATGAATTCCGAGCGGAT       | <i>hfaA</i> in-frame deletion   |
| FhfaupD           | GGCATCACCAAGCTTAACTACAAC       | <i>hfaD</i> in-frame deletion   |
| RmhfadownD        | GCGGCCTGGGAATTCTAGTCCTGA       | <i>hfaD</i> in-frame deletion   |
| FupSphhfsG        | CTGCCCGCATGCGTTCGGCCTC         | <i>hfsG</i> in-frame deletion   |
| RdwnBamHihfsG     | GTTGAGATCGGATCCGTAGGTGAT       | <i>hfsG</i> in-frame deletion   |
| hfsDHindend       | GATCAGCTTAAGCTTCTCCTCAGG       | <i>hfsDAB</i> in-frame deletion |
| hfsBHindend       | TCCATAGCCAAGCTTAGGCGCCGG       | <i>hfsDAB</i> in-frame deletion |
| FhfaBup           | GCCTTCACGCCGGGATCCAACAATCTGGGA | <i>hfaB</i> in-frame deletion   |
| RmhfadownB        | CACGTTGGCGAATTCCGACTGGCT       | <i>hfaB</i> in-frame deletion   |

50

51

52 **Table S2. Oligonucleotides used in this study**

53 Oligonucleotide sequences used in this study are listed in this table.

54

55

56 **SUPPLEMENTARY MOVIE LEGENDS**

57

58 **Movie S1. Tomogram of CB15 cell stalks.**

59 A movie containing sequential z-slices of a reconstructed tomogram of *C. crescentus* CB15  
60 cell stalk tips is presented. This tomogram shows the presence of the holdfast anchor complex  
61 at the stalk tip.

62

63 **Movie S2. Tomogram of a cell stalk tip from the *hfsG* deletion strain.**

64 A movie containing sequential z-slices of a reconstructed tomogram of *C. crescentus*  $\Delta hfsG$   
65 cell stalk tips is presented. This tomogram also shows the presence of the holdfast anchor  
66 complex at the stalk tip.

67

68 **Movie S3. Tomogram of a cell stalk tip from the *hfaB* deletion strain**

69 A movie containing sequential z-slices of a reconstructed tomogram of *C. crescentus*  $\Delta hfaB$   
70 cell stalk tips is presented. This tomogram shows the absence of the holdfast anchor complex  
71 at the stalk tip.

72

73 **SUPPLEMENTARY REFERENCES**

74

75 1. R. Simon, U. Prierer and A. Puhler. 1983. A Broad Host Range Mobilization System  
76 for *In vivo* Genetic-Engineering - Transposon Mutagenesis in Gram-Negative Bacteria. *Bio-*  
77 *Technology* 1:784-791.

78 2. J. S. Poindexter. 1964. Biological Properties and Classification of the *Caulobacter*  
79 Group. *Bacteriol Rev* 28:231-95.

80 3. J. S. Poindexter. 1978. Selection for nonbuoyant morphological mutants of *Caulobacter*  
81 *crescentus*. *J Bacteriol* 135:1141-5.

82 4. M. M. Ireland, J. A. Karty, E. M. Quardokus, J. P. Reilly and Y. V. Brun. 2002.  
83 Proteomic analysis of the *Caulobacter crescentus* stalk indicates competence for nutrient  
84 uptake. *Mol Microbiol* 45:1029-41.

85 5. M. Gonin, E. M. Quardokus, D. O'Donnol, J. Maddock and Y. V. Brun. 2000.  
86 Regulation of stalk elongation by phosphate in *Caulobacter crescentus*. *J Bacteriol* 182:337-  
87 47.

88 6. G. G. Hardy, R. C. Allen, E. Toh, M. Long, P. J. Brown, J. L. Cole-Tobian and Y. V.  
89 Brun. 2010. A localized multimeric anchor attaches the *Caulobacter* holdfast to the cell pole.  
90 *Mol Microbiol* 76:409-27.

91 7. E. Toh, H. D. Kurtz and Y. V. Brun. 2008. Characterization of the *Caulobacter*  
92 *crescentus* Holdfast Polysaccharide Biosynthesis Pathway Reveals Significant Redundancy in  
93 the Initiating Glycosyltransferase and Polymerase Steps. *J Bacteriol* 190:7219-7231.

94
